# Supplementary material for: Porous Ni nanofibers with enhanced catalytic effect on the hydrogen storage performance of MgH2
Source: Royal Society of Chemistry journal article supplement (doi:10.1039/c5ta03721b), 2015-01-01
Supplement: c5ta03721b1.pdf [file c5ta03721b1.pdf]

**Supporting information for**

**Porous Ni Nanofibers with Enhanced Catalytic Effect  
on the Hydrogen Storage Performance of MgH<sub>2</sub>**

**Jie Chen,<sup>‡a</sup> Guanglin Xia,<sup>‡a,b</sup> Zaiping Guo,<sup>b\*</sup> Zhenguo Huang,<sup>b</sup>  
Huakun Liu,<sup>b</sup> Xuebin Yu<sup>a\*</sup>**

<sup>a</sup> Department of Materials Science, Fudan University, Shanghai,  
China.  
E-mail: [yuxuebin@fudan.edu.cn](mailto:yuxuebin@fudan.edu.cn)

<sup>b</sup> Institute for Superconducting and Electronic Materials, University  
of Wollongong, Wollongong, Australia.  
E-mail: [zguo@uow.edu.au](mailto:zguo@uow.edu.au)

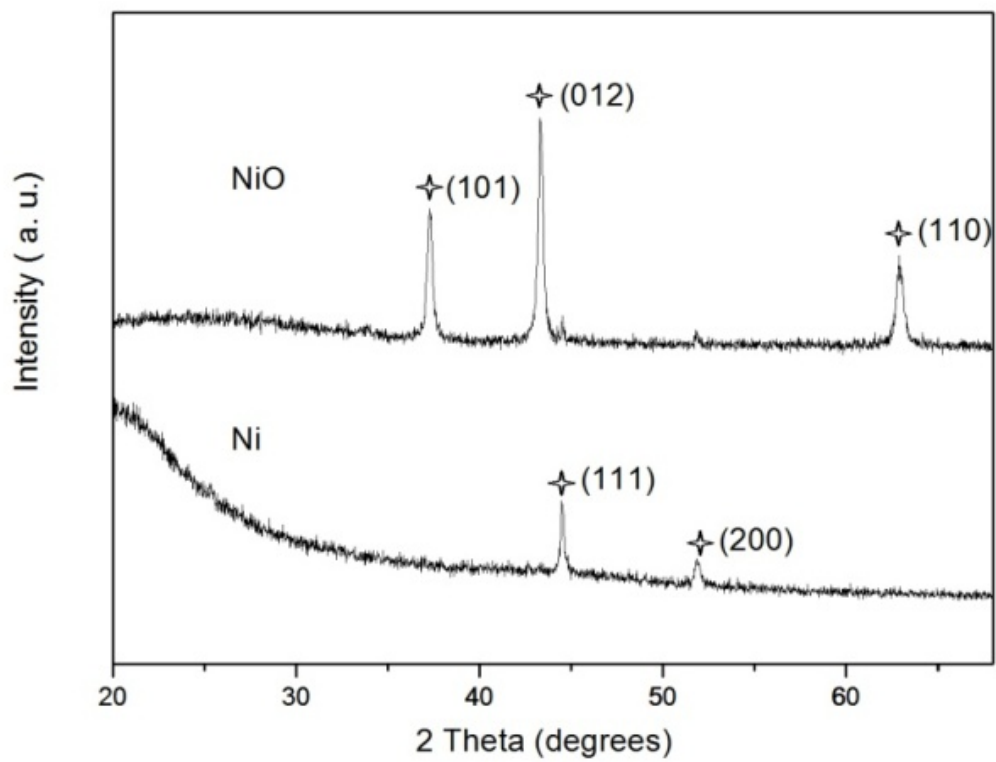

Fig.S1 XRD patterns of the obtained NiO and Ni NFs.
